# Supplementary material
Source: PubMed Central journal article supplement (PMC5584579)
Supplement: NIHMS891717-supplement.pdf [file NIHMS891717-supplement.pdf]

## The Un-predictive Brain Under Threat: A Neuro-Computational Account of Anxious Hypervigilance

### Supplemental Information

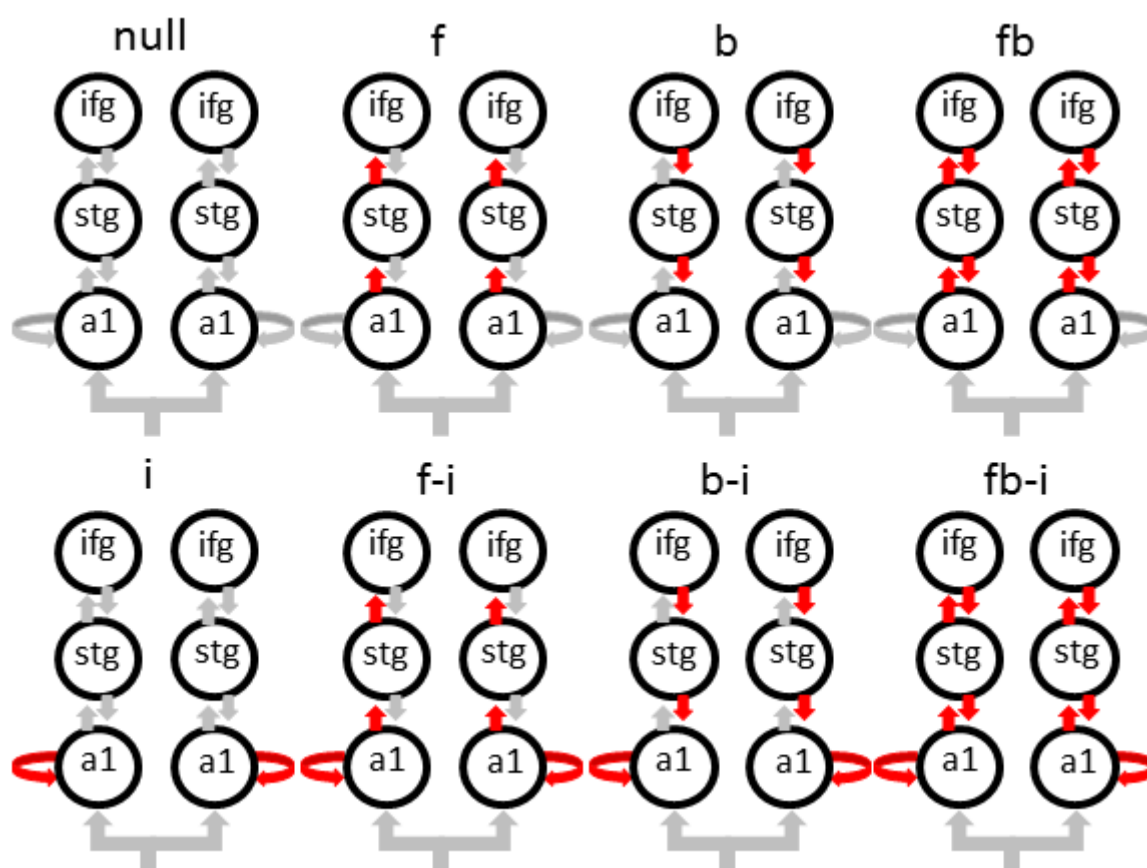

**Supplementary Figure S1. Model space explored.** Eight network models were tested all having the same 6-node structure, differing only in the presence of trial-related changes in intrinsic A1 and/or extrinsic (feedforward and feedback) modulation (highlighted by red arrows). Not shown are fixed lateral connections between left and right primary auditory cortex (A1) and left and right superior temporal gyri (STG). ifg=inferior frontal gyrus, i=intrinsic, f=feedforward, b=feedback.

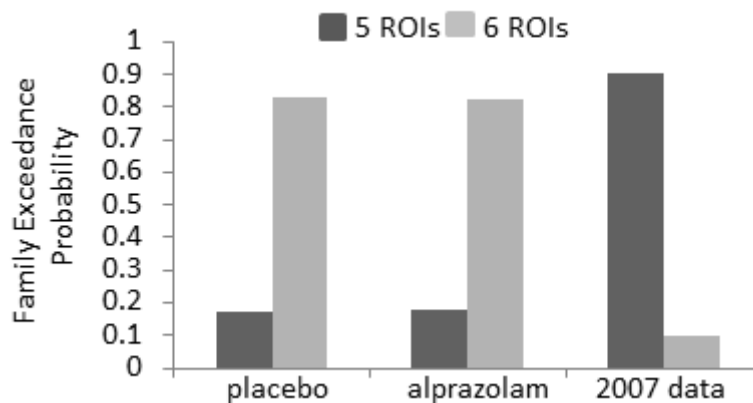

**Supplementary Figure S2. Network architectures for auditory stimulus deviance.**

Family-level inferences show that for the placebo and alprazolam treatment data, a 6-node symmetrical network performs better than a 5-node asymmetrical network. The reverse is observed in the data from Cornwell *et al.* (1).

**Supplemental Reference**

1. Cornwell BR, Baas JM, Johnson L, Holroyd T, Carver FW, *et al.* (2007): Neural responses to auditory stimulus deviance under threat of electric shock revealed by spatially-filtered magnetoencephalography. *NeuroImage* **37**: 282-289.
